# Supplementary material for: Calcium Pyrophosphate Dihydrate Crystals Increase the Granulocyte/Monocyte Progenitor (GMP) and Enhance Granulocyte and Monocyte Differentiation In Vivo
Source: MDPI journal article supplement (doi:10.3390/ijms22010262), 2020-12-29

Supplementary Figure S1. Onai

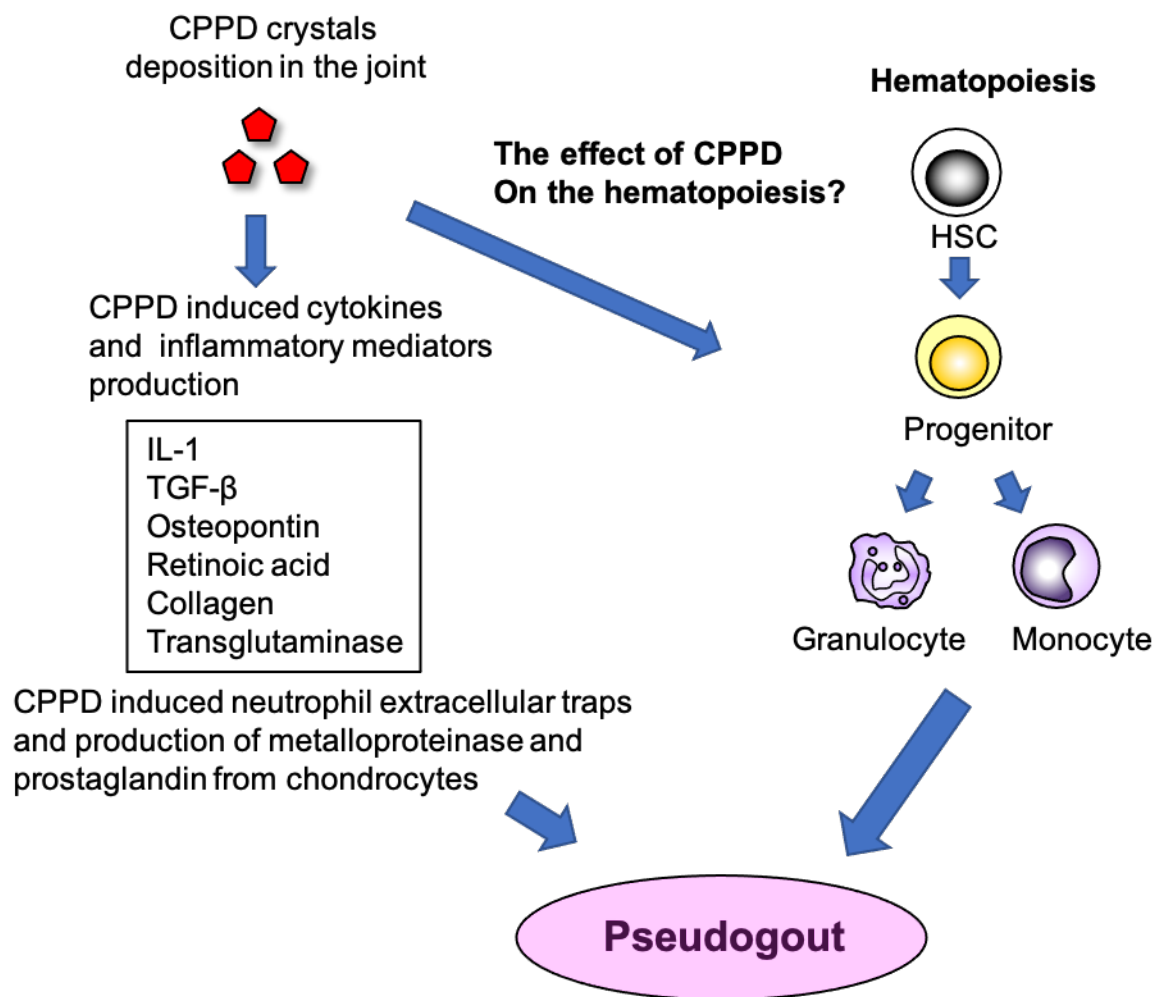

Supplement: s1 [file s1]
